# Supplementary material for: Isolation of nanobodies against Xenopus embryonic antigens using immune and non-immune phage display libraries
Source: PubMed Central journal article supplement (PMC6497274; doi:10.1371/journal.pone.0216083), 2019-05-02
Supplement: pone.0216083.s002.pdf [file pone.0216083.s002.pdf]

## S2 Fig. Selected nanobodies, their origin and activity validation.

Nanobodies obtained from the immunized llama cDNA library

| Antibodies | Clone    | Pool  | Sequence | IF      | WB        | IP        |
|------------|----------|-------|----------|---------|-----------|-----------|
| Nb-G12     | 11G12-10 | 11G12 | 11G12-10 | nuclear | 170 kD    | 170 kD    |
| Nb-G18     | G18-25   | G18   | G18-25   | nuclear | 170 kD    | n. d.     |
| Nb-N39     | N39-45   | N39   | G18-25   | nuclear | 170 kD    | n. d.     |
| Nb-G2      | 11G2-9   | 11G2  | G18-25   | nuclear | 170 kD    | 170 kD    |
| Nb-40      | 40-35-2  | 40    | G18-25   | nuclear | 170 kD    | n. d.     |
| Nb-N32     | N32-53   | N32   | G18-25   | nuclear | n. d.     | n. d.     |
| Nb-15N310  | 15N3-10  | 15N3  | 15N3-10  | nuclear | n. d.     | n. d.     |
| Nb-11G57   | 11G5-7   | 11G5  | 15N3-10  | nuclear | 170 kD    | n. d.     |
| Nb-N19     | 15N19-6  | 15N19 | 15N19-6  | golgi   | 85-90 kD  | n. d.     |
| Nb-T15     | 26T15-5  | 26T15 | 26T15-5  | golgi   | no signal | no signal |
| Nb-15N37   | 15N3-7   | 15N3  | 15N3-7   | golgi   | n. d.     | n. d.     |
| Nb-N21     | N21-47   | N21   | N21-47   | puncta  | no signal | n. d.     |
| Nb-11G59   | 11G5-9   | 11G5  | 11G5-9   | yolk    | 45 kD     | n. d.     |
| Nb-N21Y    | N21-12   | N21   | N21-12   | yolk    | 45 kD     | n. d.     |

Ndel1-specific nanobodies obtained from the non-immune llama cDNA library

| Antibodies | Sequence | ELISA with<br>xNdel1-MBP | IF with<br>xNdel1 | Immunoblotting with: |            | IP with<br>xNdel1 |
|------------|----------|--------------------------|-------------------|----------------------|------------|-------------------|
|            |          |                          |                   | xNdel1               | xNdel1-MBP |                   |
| Nb-E7      | E7       | ++                       | neural            | 39 kD                | ++         | n. d.             |
| Nb-E9      | E9       | ++                       | neural            | 39 kD                | ++         | 39 kD             |
| Nb-H3      | H3       | ++                       | no signal         | no signal            | +          | n. d.             |
| Nb-G6      | G6       | ++                       | neural            | no signal            | +          | n. d.             |
| Nb-E2      | E2       | +                        | no signal         | no signal            | no signal  | n. d.             |

Summary of the origin and reactivity of specific nanobodies presented in Fig. 2 and Fig. 5A.

IF, immunofluorescence; IB, immunoblotting; IP, immunoprecipitation; n. d., not done
